# Supplementary material for: Synthesis, Stability Studies, and Antifungal Evaluation of Substituted α- and β-2,3-Dihydrofuranaphthoquinones against Sporothrix brasiliensis and Sporothrix schenckii
Source: PubMed Central journal article supplement (PMC6429059; doi:10.3390/molecules24050930), 2019-03-07
Supplement: molecules-24-00930-s001.pdf [file molecules-24-00930-s001.pdf]

# Synthesis, stability studies and antifungal evaluation of substituted $\alpha$ - and $\beta$ -2,3-dihydrofuranaphthoquinones against *Sporothrix brasiliensis* and *Sporothrix schenckii*

Patricia Garcia Ferreira<sup>a,b</sup>, Luana Pereira Borba-Santos<sup>c</sup>, Leticia Lorena Noronha<sup>a,b</sup>,  
Caroline Deckman Nicoletti<sup>a,b</sup>, Marcella de Sá Haddad Queiroz<sup>a,b</sup>, Fernando de  
Carvalho da Silva<sup>a</sup>, Sônia Rozental<sup>c</sup>, Débora Omena Futuro<sup>b</sup>, Vitor Francisco Ferreira<sup>a,b</sup>.

<sup>a</sup>Universidade Federal Fluminense, Instituto de Química, Departamento de Química Orgânica, 24210-141, Niterói – RJ, Brazil.

<sup>b</sup>Universidade Federal Fluminense, Faculdade de Farmácia, Departamento de Tecnologia Farmacêutica, 24241-000, Niterói – RJ, Brazil.

<sup>c</sup>Universidade Federal do Rio de Janeiro, Instituto de Biofísica Carlos Filho, Laboratório de Biologia Celular de Fungos, 21941-902 - Rio de Janeiro, RJ – Brazil.

## Supplementary Material

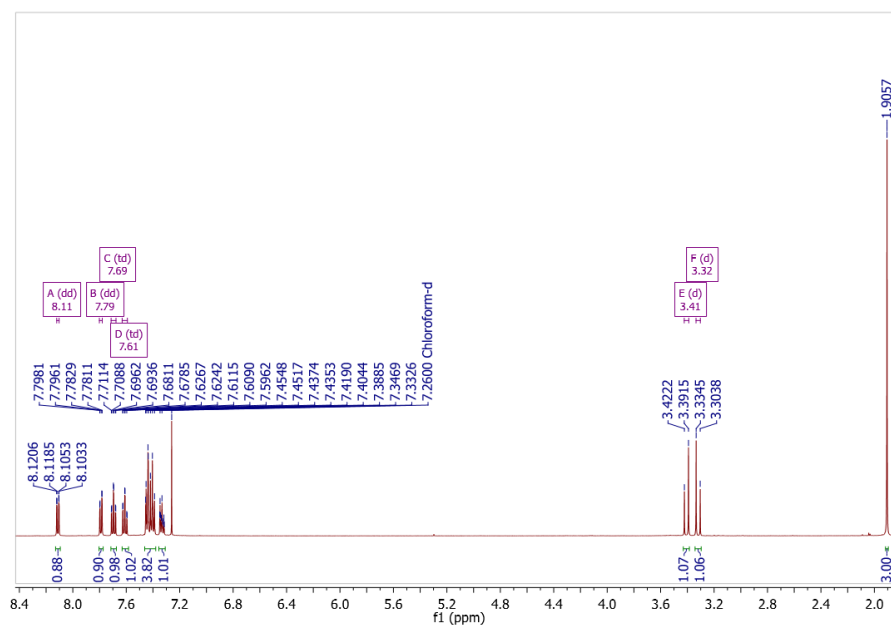

Fig.1: <sup>1</sup>H NMR spectra of compound 10 after 60 days stored at -20°C.

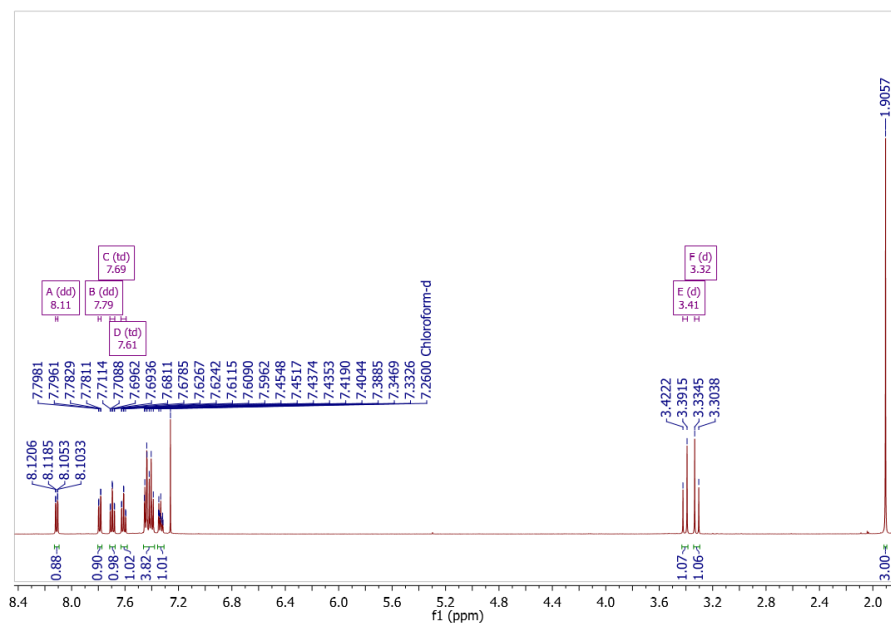

Fig.2: <sup>1</sup>H NMR spectra of compound 10 after 60 days stored at 25°C.

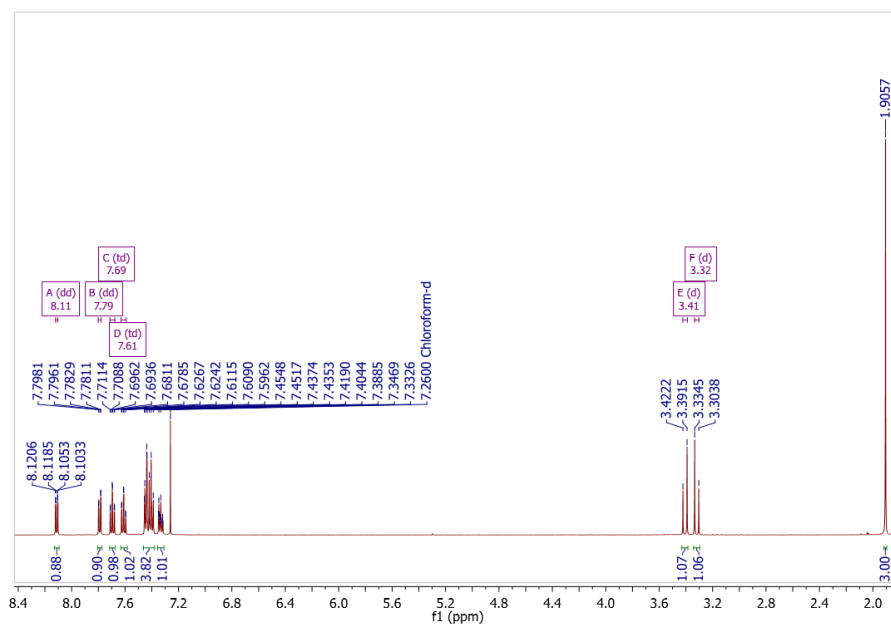

Fig.3: <sup>1</sup>H NMR spectra of compound 10 after 90 days stored at -20°C.

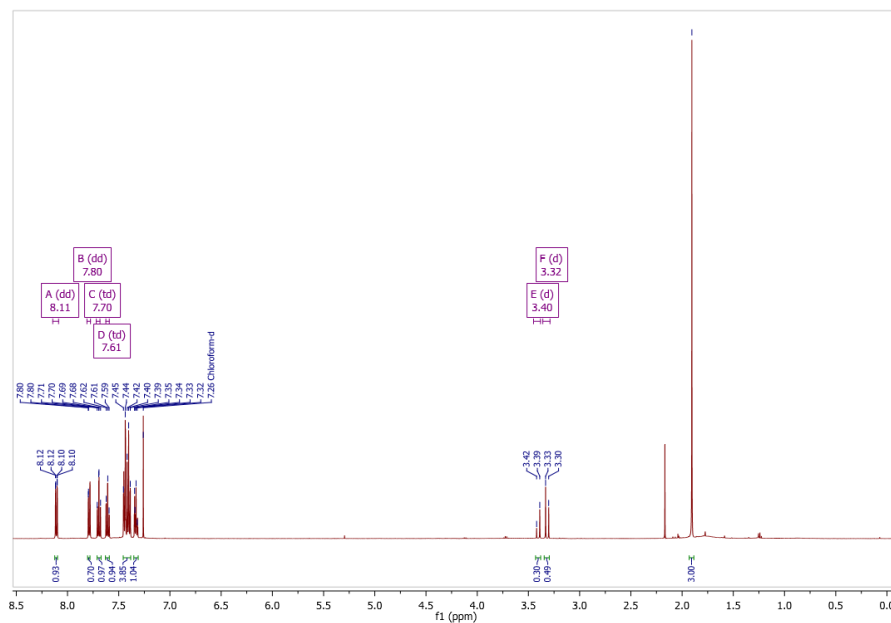

**Fig.4:** HNMR spectra of compound 10 after 90 days stored at 25°C.

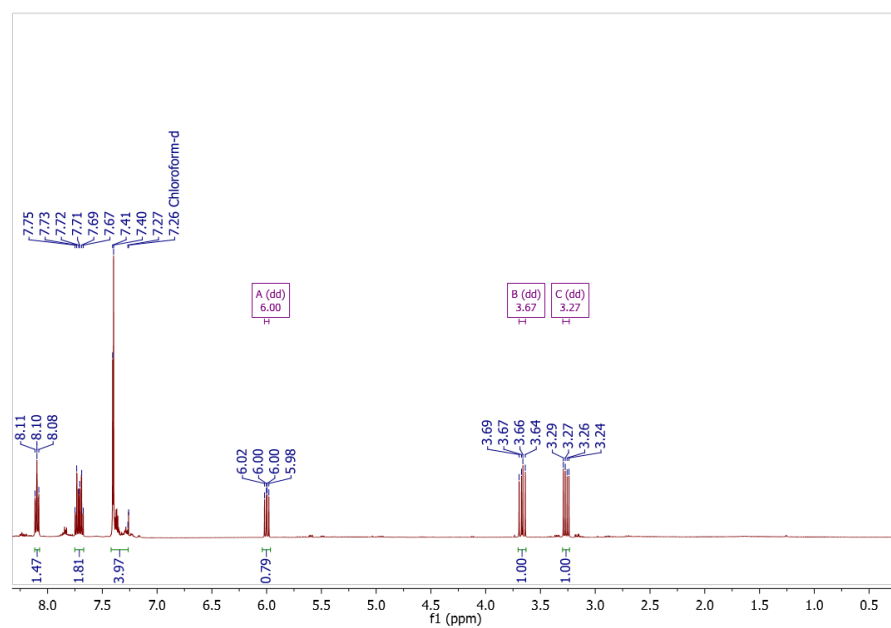

**Fig.5:** HNMR spectra of compound 6 after 60 days stored at -20°C.

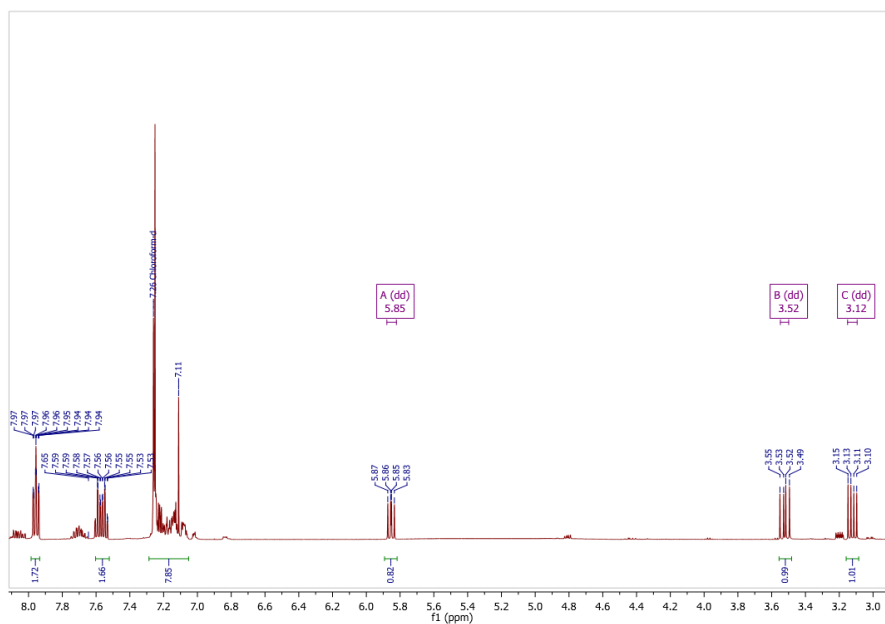

**Fig.6:** HNMR spectra of compound 6 after 60 days stored at 25°C.

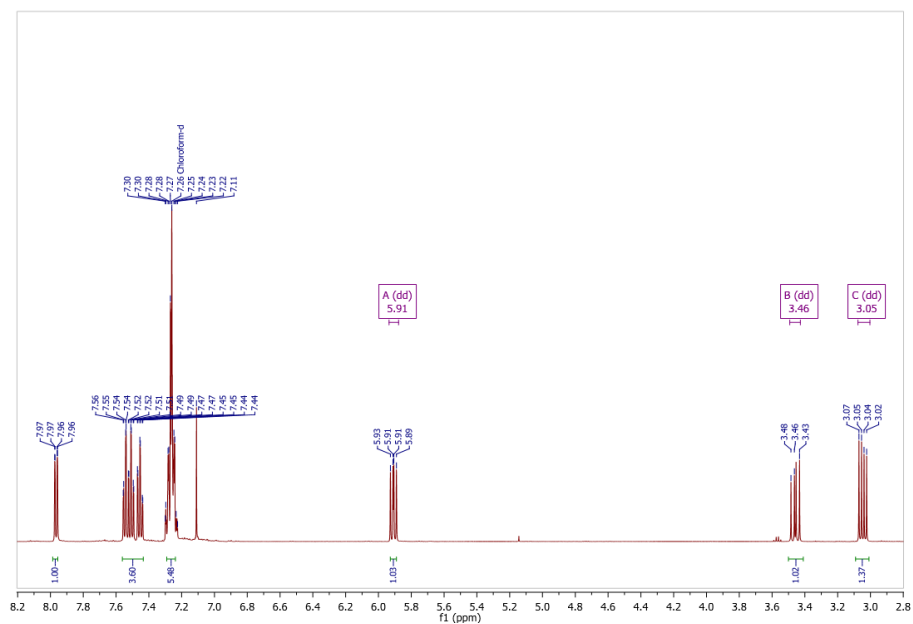

**Fig.7:** HNMR spectra of compound 6 after 90 days stored at -20°C.

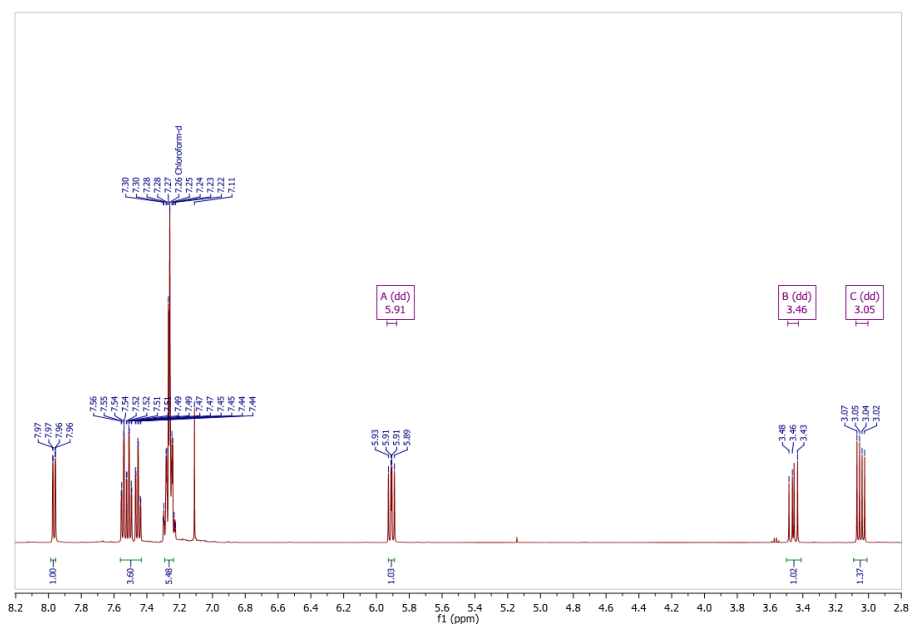

**Fig.8:** HNMR spectra of compound 6 after 90 days stored at 25°C.
